# Supplementary material for: Investigating pathways to a net-zero emissions building sector in the European Union: what role for the energy efficiency first principle?
Source: Springer Nature journal article supplement (doi:10.1007/s12053-023-10100-0), 2023-03-17
Supplement: MOESM1 [file 24639426]

# Investigating pathways to a net-zero emissions building sector in the European Union. What role for the Energy Efficiency First principle?

## Supplementary material | Model input data

The data annex of this publication provides detailed descriptions of the data sources used in the analysis presented in the main text. These data sets included in the annex are available to readers for further exploration and replication of the study's findings.

- Table S 1. Specific investments for renovation of building envelopes ..... 2
- Table S 2. Specific investments for renovation of windows ..... 2
- Table S 3. Construction cost index for building renovation activities ..... 3
- Table S 4. Specific investments for building heating systems ..... 4
- Table S 5. Techno-economic parameters of electrical appliances ..... 4
- Table S 6. Price level index for electrical appliances ..... 5
- Table S 7. Assumed demographic trends in the building sector ..... 6
- Table S 8. Assumed development of electricity demand in non-building sectors ..... 7
- Table S 9. Assumed development of hydrogen and related fuel demand in non-building sectors ..... 8
- Table S 10. Wholesale fossil fuel price trends ..... 9
- Table S 11. Techno-economic properties of conventional power plants ..... 9
- Table S 12. Techno-economic properties of solar technologies in 2050 ..... 9
- Table S 13. Techno-economic properties of three representative offshore wind turbines in 2050 ..... 10
- Table S 14. Techno-economic properties of eight representative onshore wind turbines in 2050 ..... 10
- Table S 15. Specific investment for electricity transmission technologies ..... 10
- Table S 16. Specific electricity distribution network charges ..... 11
- Table S 17. Techno-economic properties of combined heat and power technologies ..... 11
- Table S 18. Techno-economic properties of heat supply technologies ..... 12
- Table S 19. General parameters for modelling of district heating networks ..... 12
- Table S 20. Labour costs, construction price levels, and specific investment for district heating pipes ..... 13
- Table S 21. Techno-economic properties of hydrogen generation technologies ..... 13

## Energy demand

### Building retrofits

**Table S 1. Specific investments for renovation of building envelopes**

| Category                          | Cost type          | Retrofit base                        | Additional expenditure per cm insulation                                    | Refurbishment                                     |
|-----------------------------------|--------------------|--------------------------------------|-----------------------------------------------------------------------------|---------------------------------------------------|
|                                   |                    | expenditure<br>[EUR/m <sup>2</sup> ] | thickness and m <sup>2</sup> component area<br>[EUR/(cm · m <sup>2</sup> )] | expenditure <sup>a</sup><br>[EUR/m <sup>2</sup> ] |
| Buildings constructed since 1945  | Ceiling incl. roof | 190                                  | 2.97                                                                        | 136                                               |
|                                   | Ceiling flat roof  | 174                                  | 0.70                                                                        | 118                                               |
|                                   | Exterior walls     | 96                                   | 2.67                                                                        | 37                                                |
|                                   | Building base      | 29                                   | 1.14                                                                        | 0                                                 |
| Buildings constructed before 1945 | Exterior walls     | 125                                  | 3.47                                                                        | 48                                                |
|                                   | Building base      | 38                                   | 1.48                                                                        | 0                                                 |
|                                   | Ceiling            | 228                                  | 3.56                                                                        | 163                                               |

Values for Germany, excluding subsidies | Source: Hummel et al. (2020); Hummel et al. (2023) | <sup>a</sup> Activities to maintain or enhance building's aesthetics, functionality and safety, without explicitly improving thermal energy performance

**Table S 2. Specific investments for renovation of windows**

| Category              | Unit                                           | U-value [W/m <sup>2</sup> K] |     |     |      |       | Refurbishment <sup>a</sup> |
|-----------------------|------------------------------------------------|------------------------------|-----|-----|------|-------|----------------------------|
|                       |                                                | 2.7                          | 1.7 | 1.3 | 0.95 | 0.65  |                            |
| Residential           | [EUR/<br>m <sup>2</sup> <sub>component</sub> ] | -                            | 359 | 379 | 427  | 475   | 201                        |
| Non-residential       |                                                | -                            | 285 | 308 | 367  | 425   | 160                        |
| Buildings before 1945 |                                                | 461                          | 467 | 492 | 555  | 1,190 | 216                        |

Values for Germany, excluding subsidies | Source: Hummel et al. (2020), Hummel et al. (2023) | <sup>a</sup> Activities to maintain or enhance building's aesthetics, functionality and safety, without explicitly improving thermal energy performance

**Table S 3. Construction cost index for building renovation activities**

| <b>Member State</b> | <b>Index [Germany = 100]</b> |
|---------------------|------------------------------|
| Austria             | 104                          |
| Belgium             | 92                           |
| Bulgaria            | 50                           |
| Croatia             | 57                           |
| Cyprus              | 62                           |
| Czech Republic      | 63                           |
| Denmark             | 150                          |
| Estonia             | 61                           |
| Finland             | 118                          |
| France              | 108                          |
| Germany             | 100                          |
| Greece              | 66                           |
| Hungary             | 55                           |
| Ireland             | 82                           |
| Italy               | 97                           |
| Latvia              | 60                           |
| Lithuania           | 61                           |
| Luxembourg          | 102                          |
| Malta               | 82                           |
| Netherlands         | 85                           |
| Poland              | 68                           |
| Portugal            | 52                           |
| Romania             | 48                           |
| Slovakia            | 53                           |
| Slovenia            | 83                           |
| Spain               | 73                           |
| Sweden              | 139                          |

Source: Eurostat (2022e)

## Heating systems

**Table S 4. Specific investments for building heating systems**

| Technology                  | Capacity level [ $kW_{th}$ ] |      |      |      |      |      |     |     |     |      |
|-----------------------------|------------------------------|------|------|------|------|------|-----|-----|-----|------|
|                             | 7.5                          | 10   | 12.5 | 15   | 25   | 50   | 100 | 200 | 500 | 1000 |
| District heating substation | 261                          | 196  | 180  | 169  | 142  | 106  | 80  | 61  | 50  | 46   |
| Oil condensing boiler       | 736                          | 552  | 514  | 489  | 392  | 265  | 205 | 142 | 105 | 91   |
| Gas condensing boiler       | 431                          | 323  | 294  | 274  | 226  | 164  | 123 | 94  | 77  | 71   |
| Wood log boiler             | 1142                         | 856  | 788  | 743  | 623  | 474  | -   | -   | -   | -    |
| Wood chips boiler           | 2003                         | 1502 | 1311 | 1183 | 911  | 676  | 550 | 425 | 350 | 323  |
| Wood pellets boiler         | 1463                         | 1097 | 1040 | 1002 | 832  | 604  | 501 | -   | -   | -    |
| Air/water heat pump         | 1205                         | 904  | 867  | 843  | 773  | 660  | 581 | 479 | -   | -    |
| Brine/water heat pump       | 1983                         | 1487 | 1428 | 1389 | 1247 | 1040 | 923 | 728 | 612 | 570  |

Values for Germany, excluding subsidies | Source: Hummel et al. (2020); Hummel et al. (2023)

## Electrical Appliances

**Table S 5. Techno-economic parameters of electrical appliances**

| Technology        | Investment [EUR/Appliance] | Energy use [kWh/Appliance/a] |
|-------------------|----------------------------|------------------------------|
| Air conditioning  | 305 – 992                  | 196.7 – 283.2                |
| Computer screens  | 218 – 327                  | 14.2 – 18.2                  |
| Desktop computers | 397 – 518                  | 72.0 – 97.1                  |
| Dishwashers       | 394 – 686                  | 154.7 – 289.6                |
| Dryers            | 376 – 666                  | 100.6 – 266.0                |
| Freezers          | 213 – 956                  | 163.6 – 766.4                |
| Laptop computers  | 762 – 883                  | 35.6 – 44.3                  |
| Lighting          | 8 – 23                     | 1.6 – 3.3                    |
| Modems            | 65 – 97                    | 34.3 – 49.7                  |
| Refrigerators     | 165 – 762                  | 150.2 – 703.5                |
| Set-top boxes     | 81 – 101                   | 43.3 – 43.3                  |
| Stove             | 590 – 767                  | 497.7 – 681.8                |
| Televisions       | 651 – 963                  | 20.3 – 101.1                 |
| Washing machines  | 281 – 571                  | 110.0 – 227.1                |

Values for EU-27 in 2020. Investments transferred to Member State level using price level indices (Table S 6) | Ranges (Min – Max) across efficiency classes | Source: various, see Elsland (2016)

**Table S 6. Price level index for electrical appliances**

| <b>Member State</b> | <b>Index [EU27 = 100]</b> |
|---------------------|---------------------------|
| Austria             | 100                       |
| Belgium             | 106                       |
| Bulgaria            | 101                       |
| Croatia             | 101                       |
| Cyprus              | 107                       |
| Czech Republic      | 96                        |
| Denmark             | 118                       |
| Estonia             | 90                        |
| Finland             | 104                       |
| France              | 106                       |
| Germany             | 102                       |
| Greece              | 94                        |
| Hungary             | 80                        |
| Ireland             | 97                        |
| Italy               | 95                        |
| Latvia              | 88                        |
| Lithuania           | 93                        |
| Luxembourg          | 115                       |
| Malta               | 134                       |
| Netherlands         | 105                       |
| Poland              | 79                        |
| Portugal            | 105                       |
| Romania             | 93                        |
| Slovakia            | 98                        |
| Slovenia            | 103                       |
| Spain               | 99                        |
| Sweden              | 123                       |

Source: Eurostat (2022d)

## Demographic trends

*Table S 7. Assumed demographic trends in the building sector*

| Country   Year     | Buildings<br>[1000 buildings] |                | Dwelling<br>[1000 dwellings] |                | Floor area<br>[1000 m <sup>2</sup> ] |                   |
|--------------------|-------------------------------|----------------|------------------------------|----------------|--------------------------------------|-------------------|
|                    | 2020                          | 2050           | 2020                         | 2050           | 2020                                 | 2050              |
| Austria            | 2,222                         | 2,594          | 5,482                        | 6,673          | 716,782                              | 848,919           |
| Belgium            | 2,770                         | 3,199          | 5,039                        | 5,799          | 736,934                              | 861,271           |
| Bulgaria           | 1,533                         | 1,413          | 2,604                        | 2,343          | 256,520                              | 253,322           |
| Croatia            | 1,084                         | 982            | 1,652                        | 1,475          | 197,689                              | 185,589           |
| Cyprus             | 221                           | 286            | 1,474                        | 1,556          | 57,869                               | 73,075            |
| Czech Republic     | 1,667                         | 1,788          | 4,374                        | 4,564          | 486,658                              | 526,774           |
| Denmark            | 1,623                         | 1,830          | 2,838                        | 3,268          | 472,054                              | 552,807           |
| Estonia            | 199                           | 203            | 678                          | 665            | 72,654                               | 75,292            |
| Finland            | 1,442                         | 1,463          | 2,618                        | 2,642          | 384,458                              | 408,933           |
| France             | 18,370                        | 20,579         | 30,890                       | 33,802         | 4,629,150                            | 5,253,451         |
| Germany            | 22,112                        | 23,108         | 50,579                       | 52,925         | 5,920,603                            | 6,250,607         |
| Greece             | 1,989                         | 2,073          | 3,893                        | 3,982          | 637,207                              | 681,190           |
| Hungary            | 2,913                         | 2,821          | 4,267                        | 4,090          | 577,941                              | 595,944           |
| Ireland            | 1,374                         | 1,745          | 1,761                        | 2,227          | 253,367                              | 322,432           |
| Italy              | 11,598                        | 11,672         | 29,282                       | 29,108         | 4,146,791                            | 4,168,585         |
| Latvia             | 203                           | 198            | 820                          | 743            | 90,533                               | 91,310            |
| Lithuania          | 540                           | 481            | 1,343                        | 1,160          | 139,512                              | 132,192           |
| Luxembourg         | 192                           | 294            | 272                          | 432            | 53,949                               | 79,367            |
| Malta              | 104                           | 149            | 138                          | 199            | 21,563                               | 30,588            |
| Netherlands        | 4,667                         | 5,416          | 7,813                        | 8,998          | 1,266,001                            | 1,493,424         |
| Poland             | 6,710                         | 7,200          | 14,568                       | 15,715         | 1,811,518                            | 2,037,959         |
| Portugal           | 3,416                         | 3,404          | 5,331                        | 5,243          | 664,311                              | 681,291           |
| Romania            | 4,904                         | 5,008          | 7,381                        | 7,480          | 626,735                              | 656,399           |
| Slovakia           | 752                           | 773            | 1,674                        | 1,687          | 177,329                              | 188,174           |
| Slovenia           | 516                           | 559            | 779                          | 840            | 110,422                              | 123,708           |
| Spain              | 9,117                         | 10,228         | 18,544                       | 21,588         | 1,798,196                            | 2,087,644         |
| Sweden             | 2,987                         | 3,892          | 5,929                        | 7,586          | 931,468                              | 1,234,493         |
| <b>Total EU-27</b> | <b>105,226</b>                | <b>113,358</b> | <b>212,023</b>               | <b>226,789</b> | <b>27,238,213</b>                    | <b>29,894,740</b> |

## Energy demand in non-building sectors

*Table S 8. Assumed development of electricity demand in non-building sectors*

| Country        | Electric vehicles |      |      | Other transport |      |      | Other sectors |       |       |       |
|----------------|-------------------|------|------|-----------------|------|------|---------------|-------|-------|-------|
|                | Demand in TWh     | 2030 | 2040 | 2050            | 2030 | 2040 | 2050          | 2030  | 2040  | 2050  |
| Austria        |                   | 0.7  | 3.3  | 7.7             | 3.1  | 3.2  | 3.3           | 65.6  | 73    | 78.9  |
| Belgium        |                   | 1    | 4.3  | 10.1            | 1.9  | 2.2  | 2.4           | 80.5  | 94    | 109.3 |
| Bulgaria       |                   | 0.1  | 0.9  | 2.8             | 0.7  | 0.6  | 0.6           | 29.6  | 31.7  | 34.3  |
| Croatia        |                   | 0.1  | 0.4  | 1.1             | 0.5  | 0.5  | 0.6           | 13.3  | 14.4  | 15.3  |
| Cyprus         |                   | 0    | 0.1  | 0.3             | 0    | 0    | 0             | 3.3   | 3.9   | 4.7   |
| Czech Republic |                   | 0.3  | 1.8  | 4.9             | 3.2  | 3.5  | 3.6           | 56.5  | 65.4  | 73    |
| Denmark        |                   | 1.2  | 3.5  | 7.3             | 0.8  | 2    | 3.8           | 33.7  | 38.1  | 42.1  |
| Estonia        |                   | 0.1  | 0.3  | 0.9             | 0.1  | 0.1  | 0.2           | 7.3   | 7.8   | 8.3   |
| Finland        |                   | 0.4  | 2.1  | 5.6             | 1.4  | 1.9  | 2.7           | 76.3  | 84.5  | 89.8  |
| France         |                   | 4.1  | 28.6 | 93.4            | 13.8 | 15.6 | 17.5          | 372.8 | 428.7 | 475.4 |
| Germany        |                   | 5.1  | 35.7 | 101.4           | 23.2 | 39.2 | 59.9          | 511.7 | 542.6 | 573.1 |
| Greece         |                   | 0.4  | 2.4  | 5.9             | 0.1  | 0.1  | 0.1           | 44.9  | 50.1  | 53.1  |
| Hungary        |                   | 0.1  | 1    | 2.7             | 1.8  | 1.9  | 1.9           | 39    | 44.2  | 47.7  |
| Ireland        |                   | 0.2  | 1    | 2.7             | 0.1  | 0.1  | 0.2           | 23.3  | 26.7  | 29.9  |
| Italy          |                   | 1.7  | 12.2 | 34.1            | 7.5  | 7.7  | 7.3           | 271.3 | 301   | 330.9 |
| Latvia         |                   | 0    | 0.2  | 0.6             | 0.3  | 0.4  | 0.5           | 7.5   | 8.5   | 8.9   |
| Lithuania      |                   | 0.1  | 0.3  | 0.9             | 0.5  | 0.5  | 0.5           | 10.2  | 11.1  | 12.5  |
| Luxembourg     |                   | 0    | 0.2  | 0.5             | 0.1  | 0.1  | 0.1           | 7.6   | 8.9   | 9.2   |
| Malta          |                   | 0    | 0    | 0.1             | -    | -    | -             | 2.1   | 2.3   | 2.4   |
| Netherlands    |                   | 3.9  | 10.4 | 19.2            | 1.8  | 2.4  | 3.2           | 116.5 | 134.3 | 150.3 |
| Norway         |                   | 3    | 7.7  | 14.4            | 0.9  | 1.1  | 1.5           | 132.4 | 148.3 | 148   |
| Poland         |                   | 0.9  | 5.1  | 14.1            | 7.2  | 7.5  | 7.8           | 164.5 | 186.9 | 201.6 |
| Portugal       |                   | 0.5  | 2.7  | 7.1             | 0.5  | 0.4  | 0.4           | 52.1  | 57.6  | 59.7  |
| Romania        |                   | 0.3  | 1.7  | 5.6             | 2.5  | 2.8  | 2.9           | 52.5  | 61.2  | 68.9  |
| Slovakia       |                   | 0.1  | 0.5  | 1.8             | 1.4  | 1.4  | 1.4           | 29.6  | 34.7  | 36.2  |
| Slovenia       |                   | 0.1  | 0.8  | 1.8             | 0.5  | 0.6  | 0.6           | 13.8  | 14.7  | 15.6  |
| Spain          |                   | 0.9  | 6.4  | 17.6            | 4.1  | 4.8  | 5.6           | 247.8 | 269.6 | 285.3 |
| Sweden         |                   | 3.2  | 12.3 | 22.7            | 3.2  | 4    | 5.3           | 120.1 | 132.1 | 141.9 |
| Switzerland    |                   | 0.3  | 2.2  | 5.6             | 3    | 3    | 2.8           | 68.1  | 76.3  | 76.1  |
| United Kingdom |                   | 6.3  | 28.1 | 67.1            | 4.4  | 6.1  | 6.7           | 300.9 | 330.4 | 359   |

*Based on 1.5TECH scenario (European Commission 2018). Distribution between countries based on Diversification pathway of SET-Nav project (Hartner et al. 2019)*

**Table S 9. Assumed development of hydrogen and related fuel demand in non-building sectors**

| Country        | Hydrogen      |      |      | Synthetic methane |      |      | Synthetic liquid hydrocarbons |      |      |      |
|----------------|---------------|------|------|-------------------|------|------|-------------------------------|------|------|------|
|                | Demand in TWh | 2030 | 2040 | 2050              | 2030 | 2040 | 2050                          | 2030 | 2040 | 2050 |
| Austria        |               | 1.3  | 9.2  | 27                | 0.5  | 3.4  | 10.2                          | 0.9  | 6.1  | 18   |
| Belgium        |               | 3.9  | 26.7 | 74.5              | 1.5  | 10.1 | 28.1                          | 2.6  | 17.9 | 49.9 |
| Bulgaria       |               | 0.5  | 3.1  | 7.8               | 0.2  | 1.2  | 3                             | 0.3  | 2.1  | 5.2  |
| Croatia        |               | 0.1  | 0.4  | 0.8               | 0    | 0.1  | 0.3                           | 0.1  | 0.2  | 0.5  |
| Cyprus         |               | 0    | 0.1  | 0.2               | 0    | 0    | 0.1                           | 0    | 0    | 0.1  |
| Czech Republic |               | 1    | 5.9  | 14.2              | 0.4  | 2.2  | 5.3                           | 0.7  | 4    | 9.5  |
| Denmark        |               | 0    | 0.1  | 0.3               | 0    | 0    | 0.1                           | 0    | 0    | 0.2  |
| Estonia        |               | 0    | 0.2  | 0.5               | 0    | 0.1  | 0.2                           | 0    | 0.1  | 0.4  |
| Finland        |               | 0.5  | 2.7  | 6.6               | 0.2  | 1    | 2.5                           | 0.3  | 1.8  | 4.4  |
| France         |               | 5.9  | 47.8 | 148               | 2.2  | 18   | 55.8                          | 4    | 32   | 99.1 |
| Germany        |               | 9.8  | 57.2 | 143.6             | 3.7  | 21.6 | 54.1                          | 6.6  | 38.3 | 96.1 |
| Greece         |               | 0.2  | 2    | 6.5               | 0.1  | 0.7  | 2.4                           | 0.1  | 1.3  | 4.3  |
| Hungary        |               | 0.9  | 4.8  | 11.8              | 0.3  | 1.8  | 4.5                           | 0.6  | 3.2  | 7.9  |
| Ireland        |               | 0.1  | 0.8  | 2.4               | 0    | 0.3  | 0.9                           | 0    | 0.5  | 1.6  |
| Italy          |               | 3.5  | 19.6 | 50.4              | 1.3  | 7.4  | 19                            | 2.3  | 13.1 | 33.8 |
| Latvia         |               | 0    | 0    | 0                 | 0    | 0    | 0                             | 0    | 0    | 0    |
| Lithuania      |               | 0.4  | 2.2  | 5.5               | 0.1  | 0.8  | 2.1                           | 0.3  | 1.5  | 3.7  |
| Luxembourg     |               | 0    | 0    | 0                 | 0    | 0    | 0                             | 0    | 0    | 0    |
| Malta          |               | 0    | 0    | 0.1               | 0    | 0    | 0                             | 0    | 0    | 0.1  |
| Netherlands    |               | 4    | 22.6 | 56.7              | 1.5  | 8.5  | 21.3                          | 2.7  | 15.1 | 37.9 |
| Norway         |               | 0    | 0.1  | 0.3               | 0    | 0    | 0.1                           | 0    | 0    | 0.2  |
| Poland         |               | 1.9  | 9.8  | 23.4              | 0.7  | 3.7  | 8.8                           | 1.3  | 6.5  | 15.7 |
| Portugal       |               | 0.5  | 3    | 7.4               | 0.2  | 1.1  | 2.8                           | 0.4  | 2    | 5    |
| Romania        |               | 1.6  | 9.2  | 22.7              | 0.6  | 3.5  | 8.5                           | 1.1  | 6.2  | 15.2 |
| Slovakia       |               | 0.9  | 4.6  | 9.2               | 0.3  | 1.7  | 3.5                           | 0.6  | 3.1  | 6.2  |
| Slovenia       |               | 0    | 0    | 0                 | 0    | 0    | 0                             | 0    | 0    | 0    |
| Spain          |               | 2    | 11.2 | 29.2              | 0.7  | 4.2  | 11                            | 1.3  | 7.5  | 19.5 |
| Sweden         |               | 0.8  | 4.6  | 11.4              | 0.3  | 1.7  | 4.3                           | 0.5  | 3.1  | 7.6  |
| Switzerland    |               | 0    | 0.7  | 2.6               | 0    | 0.3  | 1                             | 0    | 0.5  | 1.8  |
| United Kingdom |               | 3.2  | 17.6 | 44.1              | 1.2  | 6.6  | 16.6                          | 2.1  | 11.8 | 29.5 |

*Based on 1.5TECH scenario (European Commission 2018). Distribution between countries based on Diversification pathway of SET-Nav project (Hartner et al. 2019)*



## Energy supply

### Fuel prices

**Table S 10. Wholesale fossil fuel price trends**

| Fuel        | Year | Price in EUR/MWh |
|-------------|------|------------------|
| Crude oil   | 2030 | 32.3             |
|             | 2040 | 30.7             |
|             | 2050 | 29.2             |
| Natural gas | 2030 | 21.7             |
|             | 2040 | 21.7             |
|             | 2050 | 21.7             |
| Steam coal  | 2030 | 6.0              |
|             | 2040 | 6.2              |
|             | 2050 | 6.5              |

Source: World Energy Outlook 2019 Sustainable Development scenario (IEA 2019)

### Electricity generation

**Table S 11. Techno-economic properties of conventional power plants**

| Technology                 | Year | Lifetime [a] | Investment [EUR/kW <sub>el</sub> ] | Fixed O&M [EUR/(kW <sub>el</sub> · a)] | Variable O&M [EUR/MWh] | Efficiency el |
|----------------------------|------|--------------|------------------------------------|----------------------------------------|------------------------|---------------|
| Battery storage            | 2030 | 10           | 228                                | 6                                      | 0.0                    | 95%           |
|                            | 2040 | 10           | 216                                | 6                                      | 0.0                    | 95%           |
|                            | 2050 | 10           | 204                                | 6                                      | 0.0                    | 95%           |
| Coal                       | 2030 | 20           | 1,600                              | 26                                     | 2.4                    | 43%           |
| Combined cycle gas turbine | 2030 | 20           | 775                                | 12                                     | 3.0                    | 60%           |
|                            | 2040 | 10           | 750                                | 11                                     | 3.0                    | 60%           |
| Gas turbine                | 2030 | 20           | 400                                | 8                                      | 1.5                    | 41%           |
|                            | 2040 | 10           | 400                                | 8                                      | 1.5                    | 41%           |
| Hydrogen                   | 2030 | 30           | 400                                | 8                                      | 1.5                    | 41%           |
|                            | 2040 | 30           | 400                                | 8                                      | 1.5                    | 41%           |
|                            | 2050 | 30           | 400                                | 8                                      | 1.5                    | 41%           |
| Lignite                    | 2030 | 40           | 1,700                              | 57                                     | 1.5                    | 47%           |
| Nuclear                    | 2030 | 40           | 3,500                              | 20                                     | 1.0                    | 35%           |
|                            | 2040 | 40           | 3,500                              | 20                                     | 1.0                    | 35%           |
|                            | 2050 | 40           | 3,500                              | 20                                     | 1.0                    | 35%           |
| Oil                        | 2030 | 30           | 800                                | 11                                     | 3.0                    | 58%           |
| Pumped hydro               | 2030 | 40           | 1,000                              | 23                                     | 0.0                    | 91%           |
|                            | 2040 | 40           | 900                                | 20                                     | 0.0                    | 91%           |
|                            | 2050 | 40           | 887                                | 20                                     | 0.0                    | 91%           |

Source: DeVita et al. (2018), DEA (2021) | Note: The capacity expansion of nuclear, geothermal and solar thermal plants was set exogenously for each modelled country. Coal phase-out plans were considered at country level.

**Table S 12. Techno-economic properties of solar technologies in 2050**

| Technology        | Investment [EUR/kW] | Fixed O&M [EUR/(kW · a)] | Lifetime [a] |
|-------------------|---------------------|--------------------------|--------------|
| Ground-mounted PV | 500                 | 5.0                      | 20           |
| Rooftop PV        | 764                 | 11.0                     | 20           |
| CSP               | 2,410               | 40.0                     | 20           |

Source: Lux et al. (2023) | PV = photovoltaics; CSP = concentrated solar power

**Table S 13. Techno-economic properties of three representative offshore wind turbines in 2050**

| Turbine | Hub height [m] | Specific area power [W/m <sup>2</sup> ] | Investment [EUR/kW] | Fixed O&M [EUR/(kW · a)] | Lifetime [a] |
|---------|----------------|-----------------------------------------|---------------------|--------------------------|--------------|
| 1       | 120            | 370                                     | 3,559               | 66.5                     | 20           |
| 2       | 120            | 380                                     | 3,542               | 66.3                     | 20           |
| 3       | 120            | 390                                     | 3,526               | 66.3                     | 20           |

The offshore wind potential calculations in ENERTILE take 16 different turbine configurations into account. In 2050, hub heights in the range of 100–120 m and specific area outputs of 370–450 W/m<sup>2</sup> are considered. Table shows representative combinations. See Lux et al. (2023).

**Table S 14. Techno-economic properties of eight representative onshore wind turbines in 2050**

| Turbine | Hub height [m] | Specific area power [W/m <sup>2</sup> ] | Investment [EUR/kW] | Fixed O&M [EUR/(kW · a)] | Lifetime [a] |
|---------|----------------|-----------------------------------------|---------------------|--------------------------|--------------|
| 1       | 120            | 270                                     | 1,293               | 23.1                     | 20           |
| 2       | 120            | 280                                     | 1,277               | 23.0                     | 20           |
| 3       | 120            | 290                                     | 1,261               | 22.8                     | 20           |
| 4       | 140            | 350                                     | 1,229               | 22.9                     | 20           |
| 5       | 150            | 280                                     | 1,374               | 25.4                     | 20           |
| 6       | 150            | 350                                     | 1,262               | 23.7                     | 20           |
| 7       | 160            | 270                                     | 1,423               | 26.4                     | 20           |
| 8       | 160            | 350                                     | 1,294               | 24.5                     | 20           |

The onshore wind potential calculations in ENERTILE take 59 different turbine configurations into account. In 2050, hub heights in the range of 80–160 m and specific area outputs in the range of 270–500 W/m<sup>2</sup> are considered. Table shows representative combinations. See Lux et al. (2023).

## Electricity networks

**Table S 15. Specific investment for electricity transmission technologies**

| Technology        | Unit            | Year   |        |        |
|-------------------|-----------------|--------|--------|--------|
|                   |                 | 2030   | 2040   | 2050   |
| DC line ground    | [EUR/(MW · km)] | 440    | 469    | 830    |
| AC line ground    |                 | 1,214  | 1,307  | 2,760  |
| DC line submarine |                 | 1,361  | 1,361  | 993    |
| AC/DC converter   |                 | 75,750 | 75,750 | 90,900 |

Source: Held et al. (2018), Sensfuss et al. (2019)

**Table S 16. Specific electricity distribution network charges**

| Country        | EUR/kWh | Residential electricity demand | Non-residential electricity demand |
|----------------|---------|--------------------------------|------------------------------------|
| Austria        |         | 0.053                          | 0.023                              |
| Belgium        |         | 0.092                          | 0.013                              |
| Bulgaria       |         | 0.021                          | 0.011                              |
| Croatia        |         | 0.033                          | 0.021                              |
| Cyprus         |         | 0.021                          | 0.014                              |
| Czech Republic |         | 0.041                          | 0.027                              |
| Denmark        |         | 0.039                          | 0.014                              |
| Estonia        |         | 0.033                          | 0.016                              |
| Finland        |         | 0.047                          | 0.016                              |
| France         |         | 0.042                          | 0.016                              |
| Germany        |         | 0.068                          | 0.026                              |
| Greece         |         | 0.021                          | 0.007                              |
| Hungary        |         | 0.034                          | 0.019                              |
| Ireland        |         | 0.072                          | 0.022                              |
| Italy          |         | 0.048                          | 0.010                              |
| Latvia         |         | 0.043                          | 0.027                              |
| Lithuania      |         | 0.038                          | 0.022                              |
| Luxembourg     |         | 0.075                          | 0.018                              |
| Netherlands    |         | 0.054                          | 0.019                              |
| Poland         |         | 0.042                          | 0.023                              |
| Portugal       |         | 0.040                          | 0.017                              |
| Romania        |         | 0.036                          | 0.015                              |
| Slovakia       |         | 0.040                          | 0.034                              |
| Slovenia       |         | 0.036                          | 0.013                              |
| Spain          |         | 0.061                          | 0.021                              |
| Sweden         |         | 0.040                          | 0.018                              |

Network charges as of 2020 | Source: Eurostat (2022a), Eurostat (2022b), Eurostat (2022f)

### District heating generation

**Table S 17. Techno-economic properties of combined heat and power technologies**

| Technology                     | Year | Lifetime [a] | Investment [EUR/kW] | Fixed O&M [EUR/(kW · a)] | Variable O&M [EUR/MWh] | Efficiency el (CHP) |
|--------------------------------|------|--------------|---------------------|--------------------------|------------------------|---------------------|
| Biomass CHP                    | 2030 | 25           | 3,200               | 115                      | 2.1                    | 30% (71%)           |
|                                | 2040 | 25           | 3,050               | 109                      | 2.1                    | 30% (71%)           |
|                                | 2050 | 25           | 2,900               | 103                      | 2.1                    | 30% (71%)           |
| Coal CHP                       | 2030 | 40           | 1,802               | 45                       | 1.5                    | 36% (89%)           |
| Combined cycle gas turbine CHP | 2030 | 20           | 950                 | 30                       | 3.5                    | 48% (88%)           |
|                                | 2040 | 10           | 950                 | 30                       | 3.5                    | 48% (88%)           |
| Gas turbine CHP                | 2030 | 20           | 730                 | 30                       | 2.7                    | 33% (85%)           |
|                                | 2040 | 10           | 730                 | 30                       | 2.7                    | 33% (85%)           |
| Hydrogen CHP                   | 2030 | 30           | 950                 | 30                       | 3.0                    | 48% (88%)           |
|                                | 2040 | 30           | 950                 | 30                       | 3.0                    | 48% (88%)           |
|                                | 2050 | 30           | 950                 | 30                       | 3.0                    | 48% (88%)           |
| Lignite CHP                    | 2030 | 40           | 1,952               | 45                       | 1.5                    | 36% (89%)           |

Source: DeVita et al. (2018), DEA (2021)

**Table S 18. Techno-economic properties of heat supply technologies**

| Technology            | Year | Lifetime [a] | Investment [EUR/kW] | Fixed O&M [EUR/(kW · a)] | Variable O&M [EUR/MWh] | Efficiency th |
|-----------------------|------|--------------|---------------------|--------------------------|------------------------|---------------|
| Biomass boiler        | 2030 | 25           | 830                 | 48                       | 0.7                    | 103%          |
|                       | 2040 | 25           | 790                 | 45                       | 0.7                    | 103%          |
|                       | 2050 | 25           | 750                 | 43                       | 0.7                    | 103%          |
| Electric boiler       | 2030 | 20           | 60                  | 1                        | 0.5                    | 99%           |
|                       | 2040 | 20           | 60                  | 1                        | 0.5                    | 99%           |
|                       | 2050 | 20           | 60                  | 1                        | 0.4                    | 99%           |
| Gas boiler            | 2030 | 19           | 50                  | 2                        | 0.9                    | 104%          |
|                       | 2040 | 9            | 50                  | 2                        | 0.9                    | 104%          |
| Geothermal            | 2030 | 20           | 2,250               | 85                       | 1.3                    | 100%          |
|                       | 2040 | 20           | 2,250               | 85                       | 1.3                    | 100%          |
|                       | 2050 | 20           | 2,250               | 85                       | 1.3                    | 100%          |
| Heat storage          | 2030 | 20           | 22                  | 0                        | 0.0                    | 99%           |
|                       | 2040 | 20           | 22                  | 0                        | 0.0                    | 99%           |
|                       | 2050 | 20           | 22                  | 0                        | 0.0                    | 99%           |
| Hydrogen boiler       | 2030 | 25           | 50                  | 2                        | 0.9                    | 104%          |
|                       | 2040 | 25           | 50                  | 2                        | 0.9                    | 104%          |
|                       | 2050 | 25           | 50                  | 2                        | 0.9                    | 104%          |
| Large-scale heat pump | 2030 | 25           | 590                 | 2                        | 1.7                    | variable *    |
|                       | 2040 | 25           | 560                 | 2                        | 1.7                    | variable *    |
|                       | 2050 | 25           | 530                 | 2                        | 1.6                    | variable *    |
| Solarthermal          | 2030 | 20           | 950                 | 10                       | 0.7                    | 100%          |
|                       | 2040 | 20           | 950                 | 10                       | 0.7                    | 100%          |
|                       | 2050 | 20           | 950                 | 10                       | 0.7                    | 100%          |

Source: DeVita et al. (2018), DEA (2021) † \* Endogenously determined in ENERTILE model, see Bernath et al. (2019)

#### District heating networks

**Table S 19. General parameters for modelling of district heating networks**

| Indicator                               | Value | Unit |
|-----------------------------------------|-------|------|
| Investment lifetime                     | 30    | a    |
| Average building access pipe length     | 10    | m    |
| Average supply temperatures             | 90    | °C   |
| Average return temperatures             | 60    | °C   |
| Average full load hours                 | 2,000 | h    |
| Average pump efficiency                 | 75    | %    |
| Average pipe differential pressure loss | 150   | Pa/m |
| Specific maintenance cost factor        | 15    | %    |

**Table S 20. Labour costs, construction price levels, and specific investment for district heating pipes**

| Country     | Construction sector hourly labour cost in 2019 [EUR/h] | Construction price level index in 2019 [EU27 = 100] | Calculated specific pipe investment* [EUR/m] |
|-------------|--------------------------------------------------------|-----------------------------------------------------|----------------------------------------------|
| Austria     | 35.7                                                   | 114                                                 | 959                                          |
| Belgium     | 36.4                                                   | 99                                                  | 872                                          |
| Bulgaria    | 4.7                                                    | 52                                                  | 402                                          |
| Croatia     | 9.9                                                    | 49                                                  | 418                                          |
| Czechia     | 12.1                                                   | 69                                                  | 570                                          |
| Denmark     | 41.6                                                   | 135                                                 | 1,131                                        |
| Estonia     | 14.6                                                   | 75                                                  | 629                                          |
| Finland     | 35                                                     | 148                                                 | 1,178                                        |
| France      | 33.4                                                   | 101                                                 | 864                                          |
| Germany     | 29.6                                                   | 144                                                 | 1,116                                        |
| Greece      | 10.3                                                   | 61                                                  | 504                                          |
| Hungary     | 8.3                                                    | 61                                                  | 490                                          |
| Ireland     | 27.8                                                   | 109                                                 | 963                                          |
| Italy       | 24                                                     | 81                                                  | 742                                          |
| Latvia      | 10.4                                                   | 69                                                  | 558                                          |
| Lithuania   | 8.4                                                    | 67                                                  | 534                                          |
| Luxembourg  | 28                                                     | 110                                                 | 886                                          |
| Netherlands | 37.1                                                   | 122                                                 | 1,022                                        |
| Poland      | 10.1                                                   | 66                                                  | 535                                          |
| Romania     | 6.1                                                    | 47                                                  | 377                                          |
| Slovakia    | 10.3                                                   | 74                                                  | 596                                          |
| Slovenia    | 15.3                                                   | 64                                                  | 561                                          |
| Spain       | 20.2                                                   | 79                                                  | 704                                          |
| Sweden      | 36.5                                                   | 146                                                 | 1,172                                        |

\* Weighted average costs from the NetHEAT model results | Sources: Eurostat (2022c), Eurostat (2022e)

## Hydrogen generation

**Table S 21. Techno-economic properties of hydrogen generation technologies**

| Technology                  | Year | Lifetime | Investment [EUR/kW] | Fixed O&M [EUR/(kW · a)] | Variable O&M [EUR/MWh] | Efficiency |
|-----------------------------|------|----------|---------------------|--------------------------|------------------------|------------|
| H <sub>2</sub> electrolyser | 2030 | 20       | 481                 | 22                       | 0.0                    | 66%        |
|                             | 2040 | 20       | 404                 | 21                       | 0.0                    | 68%        |
|                             | 2050 | 20       | 327                 | 19                       | 0.0                    | 71%        |
| Methanation reactor         | 2030 | 20       | 1,275               | 49                       | 0.0                    | 47%        |
|                             | 2040 | 20       | 948                 | 36                       | 0.0                    | 49%        |
|                             | 2050 | 20       | 832                 | 32                       | 0.0                    | 52%        |

Source: Lux and Pfluger (2020), own assumptions

## References

- Bernath, C., Deac, G., & Sensfuß, F. (2019). Influence of heat pumps on renewable electricity integration: Germany in a European context. *Energy Strategy Reviews*, 26, 100389. doi:10.1016/j.esr.2019.100389.
- DEA. (2021). *Technology Data for Generation of Electricity and District Heating*. Copenhagen: Danish Energy Agency (DEA).
- DeVita, A., Kielichowska, I., & Mandatowa, P. (2018). *Technology pathways in decarbonisation scenarios*. Brussels: ASSET Project.
- Elsland, R. (2016). *Long-term Energy Demand in the German Residential Sector: Development of an Integrated Modelling Concept to Capture Technological Myopia*. Baden-Baden: Nomos.
- European Commission. (2018). *A Clean Planet for all: European long-term strategic vision for a prosperous, modern, competitive and climate neutral economy*. In-depth analysis in support of the Commission Communication COM(2018) 773. Brussels: European Commission.
- Eurostat. (2022a). Online data code: Electricity prices components for household consumers - annual data (from 2007 onwards) [NRG\_PC\_204\_C]; Indicator: Consumption of kWh - all bands [TOT\_KWH]. <https://ec.europa.eu/eurostat/data/database>. Accessed 11 August 2022.
- Eurostat. (2022b). Online data code: Electricity prices components for non-household consumers - annual data (from 2007 onwards) [NRG\_PC\_205\_C]; Category: Consumption less than 20 MWh - band IA [MWH\_LT20]. <https://ec.europa.eu/eurostat/data/database>. Accessed 11 August 2022.
- Eurostat. (2022c). Online data code: Labour cost levels by NACE Rev. 2 activity [LC\_LCI\_LEV]; Indicator: Labour cost for LCI (compensation of employees plus taxes minus subsidies) [D1\_D4\_MD5]. <https://ec.europa.eu/eurostat/data/database>. Accessed 18 August 2022.
- Eurostat. (2022d). Online data code: Purchasing power parities (PPPs), price level indices and real expenditures for ESA 2010 aggregates [PRC\_PPP\_IND]; Indicator: Price level indices (EU27\_2020=100) [PLI\_EU27\_2020]. Category: Households appliances [A010503]. <https://ec.europa.eu/eurostat/data/database>. Accessed 12 July 2022.
- Eurostat. (2022e). Online data code: Purchasing power parities (PPPs), price level indices and real expenditures for ESA 2010 aggregates [PRC\_PPP\_IND]; Indicator: Price level indices (EU27\_2020=100) [PLI\_EU27\_2020]. Category: Construction [A0502]. <https://ec.europa.eu/eurostat/data/database>. Accessed 12 July 2022.
- Eurostat. (2022f). Online data code: Share for transmission and distribution in the network cost for gas and electricity - annual data [NRG\_PC\_206]. <https://ec.europa.eu/eurostat/data/database>. Accessed 24 January 2023.
- Hartner, M., Forthuber, S., Kranzl, L., Fritz, S., Aichinger, E., Müller, A., et al. (2019). *Summary report -Energy Systems: Demand perspective: Deliverable D5.8 of the SET-Nav Project*. Wien: SET-Nav Project.
- Held, A., Ragwitz, M., Sensfuß, F., Resch, G., Olmos, L., Ramos, A., et al. (2018). How can the renewables targets be reached cost-effectively? Policy options for the development of renewables and the transmission grid. *Energy Policy*, 116, 112–126. doi:10.1016/j.enpol.2018.01.025.
- Hummel, M., Büchele, R., Müller, A., Aichinger, E., Steinbach, J., Kranzl, L., et al. (2020). The costs and potentials for heat savings in buildings: Refurbishment costs and heat saving cost curves for 6 countries in Europe. *Energy and Buildings*, 110454. doi:10.1016/j.enbuild.2020.110454.
- Hummel, M., Müller, A., Forthuber, S., Kranzl, L., Mayr, B., & Haas, R. (2023). How cost efficient is energy efficiency in buildings? A comparison of building shell efficiency & heating system change in the European building stock: Submitted for publication. *Energy Efficiency*.
- IEA. (2019). *World Energy Outlook 2019*. Paris: International Energy Agency (IEA).
- Lux, B., & Pfluger, B. (2020). A supply curve of electricity-based hydrogen in a decarbonized European energy system in 2050. *Applied Energy*, 269, 115011. doi:10.1016/j.apenergy.2020.115011.
- Lux, B., Schneck, N., Pfluger, B., Männer, W., & Sensfuß, F. (2023). Potentials of direct air capture and storage in a greenhouse gas-neutral European energy system. *Energy Strategy Reviews*, 45, 101012. doi:10.1016/j.esr.2022.101012.
- Sensfuß, F., Bernath, C., Kleinschmitt, C., Resch, G., Geipel, J., Hiesl, A., et al. (2019). *Summary report - Energy Systems: Supply Perspective: Deliverable D7.8 of the SET-Nav Project*. Wien: SET-Nav Project.
